# Supplementary material for: The Use of Cabozantinib in Advanced Hepatocellular Carcinoma in Hong Kong—A Territory-Wide Cohort Study
Source: MDPI journal article supplement (doi:10.3390/cancers13092002), 2021-04-21
Supplement: s1 [file s1]

Table S1. Detailed prior systemic treatments

| Previous therapies, <i>n</i> (%)       | All patients | Single Agent<br>( <i>n</i> = 27) | Combination<br>( <i>n</i> = 15) |
|----------------------------------------|--------------|----------------------------------|---------------------------------|
| Curative Resection                     | 21 (50%)     | 9 (33.3%)                        | 12 (80%)                        |
| Radiotherapy                           | 10 (23.8%)   | 6 (22.2%)                        | 4 (26.7%)                       |
| Transarterial chemoembolization (TACE) | 20 (47.6%)   | 13 (48.1%)                       | 7 (46.7%)                       |
| Liver Transplant                       | 1 (2.4%)     | 1 (3.7%)                         | 0                               |
| Any TKI                                | 40 (95.2%)   | 26 (96.3%)                       | 14 (93.3%)                      |
| Lenvatinib                             | 28 (66.7%)   | 15 (55.6%)                       | 13 (86.7%)                      |
| Sorafenib                              | 17 (40.5%)   | 14 (51.9%)                       | 3 (20%)                         |
| Regorafenib                            | 3 (7.1%)     | 2 (7.4%)                         | 1 (6.7%)                        |
| Axitinib                               | 2 (4.8%)     | 2 (7.4%)                         | 0                               |
| Any ICI                                | 31 (73.8%)   | 16 (59.3%)                       | 15 (100%)                       |
| Anti-PD1                               | 19 (45.2%)   | 12 (44.4%)                       | 7 (46.7%)                       |
| Anti-PD1 & Anti-CTLA-4                 | 12 (28.6%)   | 5 (18.5%)                        | 7 (46.7%)                       |
| VEGF inhibitors                        | 8 (19.0%)    | 1 (3.7%)                         | 7 (46.7%)                       |
| Chemotherapy                           | 7 (16.7%)    | 3 (11.1%)                        | 4 (26.7%)                       |
| mTOR inhibitor                         | 7 (16.7%)    | 2 (7.4%)                         | 5 (33.3%)                       |
| Blue-554                               | 1 (2.4%)     | 1 (3.7%)                         | 0                               |
| NIS793+PDR001                          | 1 (2.4%)     | 1 (3.7%)                         | 0                               |
