# Supplementary material for: The Use of Cabozantinib in Advanced Hepatocellular Carcinoma in Hong Kong—A Territory-Wide Cohort Study
Source: MDPI journal article supplement (doi:10.3390/cancers13092002), 2021-04-21
Supplement: s1 [file s1]

Supplementary Table 2. Cabozantinib combination details (*n* = 15)

|              |                         |            |
|--------------|-------------------------|------------|
| <i>n</i> (%) |                         |            |
| Any ICI      |                         | 15 (100%)  |
| ICI used     | Anti-PD-1 only          | 4 (26.7%)  |
|              | Anti-PD-1 + Anti-CTLA-4 | 11 (73.3%) |
|              |                         |            |
| Others       |                         | 2 (13.3%)  |
